# Supplementary material for: A Review of Hybrid Soft Computing and Data Pre-Processing Techniques to Forecast Freshwater Quality’s Parameters: Current Trends and Future Directions
Source: MDPI journal article supplement (doi:10.3390/environments9070085), 2022-07-02
Supplement: s1 [file s1]

**Table S1:** Abbreviations.

| Abbreviations | Description                                  | Abbreviations    | Description                                                                  |
|---------------|----------------------------------------------|------------------|------------------------------------------------------------------------------|
| WQ            | Water quality                                | MODWT            | Maximum overlap discrete wavelet transformation                              |
| AI            | Artificial intelligence                      |                  |                                                                              |
| DT            | Diction tree                                 | ACO <sub>R</sub> | Ant colony optimisation                                                      |
| DL            | Deep learning                                | WA               | Wavelet analysis                                                             |
| ANN           | Artificial neural network                    | RS               | Random Subspace                                                              |
| ANFIS         | Adaptive neural-based fuzzy inference system | AIG              | Algorithm of the innovative gunner                                           |
| ARIMA         | Auto-regressive integrated moving average    | CSO              | Chicken swarm optimisation                                                   |
| SVM           | Support victor Machin                        | PSO              | Particle swarm optimisation                                                  |
| SVR           | Support vector regression                    | RC               | Random Committee                                                             |
| FFNN          | Feed forward neural network                  | EKF              | Extended kalman filter                                                       |
| LSTM          | Long short-term memory                       | AR               | Additive regression                                                          |
| RBFNN         | Radial basis function neural network         | FFA              | Firefly algorithm                                                            |
| GRNN          | General regression neural network model      | SAE              | Sparse Auto-Encoder                                                          |
| DBN           | Deep belief network model                    | IABC             | Improved artificial bee colony                                               |
| CNN           | Convolutional neural network                 | ABC              | Artificial bee colony                                                        |
| RNN           | Recurrent neural network                     | GBO              | Gradient-based optimiser                                                     |
| BNN           | Bayesian neural network                      | kPCA             | Kernal Principal Component Analysis                                          |
| QRF           | Quantile regression forest                   | CS               | Cuckoo search                                                                |
|               |                                              | CEEMDAN          | Complete ensemble empirical mode decomposition algorithm with adaptive noise |
| RF            | Random forest                                | GBO              | Gradient-based optimiser                                                     |
| GEP           | Gene expression programming                  | kPCA             | Kernal Principal Component Analysis                                          |
| GBM           | Stochastic Gradient Boosting                 | CS               | Cuckoo search                                                                |
| GBM_H2O       | Gradient Boosting Machines                   | EEMD             | Ensemble empirical mode decomposition                                        |
| M5P           | M5 prime                                     | IGRA             | Improved Grey Relational Analysis                                            |
| XGB           | Extreme Gradient Boosting                    | SWT              | Synchrosqueezed wavelet transform                                            |
| ELM           | Extreme Learning Machine                     | LR               | Linear regression                                                            |
| MLR           | Multi-linear regression                      | OBL              | Opposition-based learning                                                    |

**Table S1:** Abbreviations.

| Abbreviations     | Description                                                                                             | Abbreviations      | Description                       |
|-------------------|---------------------------------------------------------------------------------------------------------|--------------------|-----------------------------------|
| MARS              | Multivariate adaptive regression splines                                                                | BWO                | Black widow optimisation          |
| LSSVR             | Least squares support vector regression                                                                 | ISSA               | Improved sparrow search algorithm |
| XGBoost           | Extreme gradient boosting                                                                               | ISA                | Improved simulated annealing      |
| LSSVM             | Least square support vector machine                                                                     | DE                 | Differential Evolution            |
| LWLR              | Locally weighted linear regression                                                                      | DWT                | Discrete wavelet transform        |
| cForest           | Conditional random forests                                                                              | U1                 | Theil U statistic 1               |
| Ranger            | Random forest geneRator                                                                                 | U2                 | Theil U statistic 2               |
| R <sup>2</sup>    | Determination coefficient                                                                               | W index            | Willmott's index of agreement     |
| RMSE              | Root mean square error                                                                                  | MCC                | Matthews correlation coefficient  |
| MAE               | Mean absolute error                                                                                     | FM index           | Fowlkes-Mallows index             |
| MPE               | Mean percentage error                                                                                   | TOC                | Total organic carbon              |
| CE                | Coefficient of efficiency                                                                               | NSE                | Nash-Sutcliffe efficiency         |
| R                 | Correlation coefficient                                                                                 |                    |                                   |
| MSRE              | mean squared relative error                                                                             | RAE                | Relative absolute error           |
| WL                | Water level                                                                                             | WT                 | Water temperature                 |
| TP                | Total phosphorus                                                                                        | NH <sub>3</sub> -N | Ammonia nitrogen                  |
| COD <sub>Mn</sub> | Potassium permanganate index                                                                            | ORP                | Oxidation-reduction potential     |
| HW                | Hammerstein-Weiner                                                                                      | WS                 | Wind speed                        |
| DO                | Dissolved oxygen                                                                                        | AP                 | Atmospheric pressure              |
| EC                | Electrical conductivity                                                                                 | Am                 | Ammonia nitrogen content          |
| T                 | Temperature                                                                                             | Hu                 | Air humidity                      |
| TDS               | Total dissolved solid                                                                                   | TN                 | Total nitrogen concentration      |
| TH                | Total hardness                                                                                          | CH                 | Carbonate hardness                |
| Chl-a             | Chlorophyll-a                                                                                           | SAR                | Sodium adsorption ratio           |
| pH                | Hydrogen ion concentration                                                                              | Talk               | Total alkalinity                  |
| Q                 | Discharge                                                                                               | BOD                | Biochemical oxygen demand         |
| CC                | Correlation coefficient                                                                                 | VMD                | Variational mode decomposition    |
| SSA               | Sparrow search algorithm                                                                                | GRU                | Gated recurrent unit              |
| HAB               | Harmful algal blooms                                                                                    | GDM                | Gradient Descent with Momentum    |
| CEEMDAN-LZC       | Combination of complete ensemble empirical mode decomposition with an adaptive noise Lempel-Ziv complex | FCM                | Fuzzy clustering method           |
| GP                | Grid partitioning                                                                                       | IDW                | Inverse distance weighting        |
| NF                | Neuro-fuzzy                                                                                             | CGA                | Continuous genetic algorithm      |
| BN                | Bayesian network                                                                                        | WGP                | Wavelete genetic programation     |

**Table S1:** Abbreviations.

| Abbreviations | Description                                    | Abbreviations | Description                                 |
|---------------|------------------------------------------------|---------------|---------------------------------------------|
| KGE           | Kling–Gupta efficiency                         | md            | Modified index of agreement                 |
| mNSE          | Modified Nash–Sutcliffe efficiency coefficient | RSR           | Ratio of the RMSE to the standard deviation |
| GM            | Grey model                                     | IGA           | Improved genetic algorithm                  |
| DE            | Differential evolution                         | DOM           | Dissolved Organic Matter                    |
|               |                                                | WVP           | Water vapor pressure                        |
| FWNN          | Fuzzy wavelet neural network                   | WNN           | Wavelet neural network                      |
| MLE           | Maximal Lyapunov exponent                      | MOGA          | Multi-objective Genetic algorithm           |
| MRE           | Maximum relative error                         |               |                                             |

**Table S2:** Review of researchers who used data pre-processing.

| References | Normalisation | Cleaning | Select the best model input |
|------------|---------------|----------|-----------------------------|
| [4]        | ✓             | ✗        | ✓                           |
| [59]       | ✗             | ✓        | ✓                           |
| [69]       | ✓             | ✓        | ✓                           |
| [60]       | ✓             | ✓        | ✗                           |
| [86]       | ✗             | ✗        | ✓                           |
| [57]       | ✓             | ✗        | ✗                           |
| [58]       | ✗             | ✗        | ✗                           |
| [97]       | ✗             | ✓        | ✓                           |
| [98]       | ✗             | ✓        | ✓                           |
| [105]      | ✗             | ✓        | ✓                           |
| [90]       | ✗             | ✗        | ✓                           |
| [99]       | ✗             | ✓        | ✓                           |
| [16]       | ✗             | ✓        | ✓                           |
| [100]      | ✓             | ✗        | ✓                           |
| [85]       | ✓             | ✓        | ✓                           |
| [38]       | ✓             | ✓        | ✗                           |
| [28]       | ✗             | ✗        | ✓                           |
| [91]       | ✗             | ✓        | ✗                           |
| [83]       | ✗             | ✗        | ✗                           |
| [81]       | ✓             | ✓        | ✗                           |
| [23]       | ✗             | ✓        | ✓                           |
| [94]       | ✓             | ✓        | ✓                           |
| [67]       | ✓             | ✗        | ✗                           |
| [68]       | ✗             | ✗        | ✓                           |
| [95]       | ✓             | ✗        | ✓                           |
| [96]       | ✓             | ✓        | ✓                           |
| [73]       | ✗             | ✗        | ✓                           |
| [78]       | ✓             | ✗        | ✓                           |
| [80]       | ✗             | ✗        | ✗                           |
| [87]       | ✗             | ✗        | ✓                           |
| [92]       | ✓             | ✓        | ✓                           |
| [93]       | ✗             | ✓        | ✓                           |
| [101]      | ✓             | ✓        | ✓                           |
| [102]      | ✗             | ✓        | ✗                           |
| [103]      | ✓             | ✗        | ✓                           |
| [104]      | ✗             | ✓        | ✗                           |
| [106]      | ✗             | ✗        | ✗                           |
| [107]      | ✓             | ✓        | ✓                           |
| [74]       | ✗             | ✗        | ✗                           |
| [108]      | ✓             | ✗        | ✗                           |
| [75]       | ✗             | ✗        | ✗                           |
| [109]      | ✓             | ✗        | ✓                           |
| [110]      | ✓             | ✓        | ✓                           |
| [111]      | ✗             | ✗        | ✓                           |
| [112]      | ✓             | ✓        | ✓                           |
| [113]      | ✓             | ✗        | ✓                           |
| [114]      | ✗             | ✓        | ✓                           |
| [56]       | ✗             | ✗        | ✓                           |
| [115]      | ✗             | ✓        | ✗                           |

**Table S2:** Review of researchers who used data pre-processing.

| References | Normalisation | Cleaning | Select the best model input |
|------------|---------------|----------|-----------------------------|
| [116]      | ✓             | ✓        | ✓                           |
| [89]       | ✓             | ✓        | ✓                           |

## Reference

4. Melesse, A.M.; Khosravi, K.; Tiefenbacher, J.P.; Heddam, S.; Kim, S.; Mosavi, A.; Pham, B.T. River Water Salinity Prediction Using Hybrid Machine Learning Models. *Water* **2020**, *12*, 2951. <https://doi.org/10.3390/w12102951>.
16. Banadkooki, F.B.; Ehteram, M.; Panahi, F.; Sh. Sammen, S.; Othman, F.B.; El-Shafie, A. Estimation of total dissolved solids (TDS) using new hybrid machine learning models. *J. Hydrol.* **2020**, *587*, 124989. <https://doi.org/10.1016/j.jhydrol.2020.124989>.
23. Zhang, Y.-F.; Fitch, P.; Thorburn, P.J. Predicting the Trend of Dissolved Oxygen Based on the kPCA-RNN Model. *Water* **2020**, *12*, 585. <https://doi.org/10.3390/w12020585>.
28. Tiyyasha, T.; Tung, T.M.; Bhagat, S.K.; Tan, M.L.; Jawad, A.H.; Mohtar, W.H.M.W.; Yaseen, Z.M. Functionalization of remote sensing and on-site data for simulating surface water dissolved oxygen: Development of hybrid tree-based artificial intelligence models. *Mar. Pollut. Bull.* **2021**, *170*, 112639. <https://doi.org/10.1016/j.marpolbul.2021.112639>.
38. Lu, H.; Ma, X. Hybrid decision tree-based machine learning models for short-term water quality prediction. *Chemosphere* **2020**, *249*, 126169. <https://doi.org/10.1016/j.chemosphere.2020.126169>.
56. Lola, M.S.; Zainuddin, N.H.; Abdullah, M.T.; Ponniah, V.; Ramlee, M.N.A.; Zakariya, R.; Idris, M.S.; Khalili, I. Improving the performance of ann-arima models for predicting water quality in the offshore area of kuala terengganu, terengganu, malaysia. *J. Sustain. Sci. Manag.* **2018**, *13*, 27–37.
57. Barzegar, R.; Aalami, M.T.; Adamowski, J. Short-term water quality variable prediction using a hybrid CNN–LSTM deep learning model. *Stoch. Environ. Res. Risk Assess.* **2020**, *34*, 415–433. <https://doi.org/10.1007/s00477-020-01776-2>.
58. Baek, S.-S.; Pyo, J.; Chun, J.A. Prediction of Water Level and Water Quality Using a CNN-LSTM Combined Deep Learning Approach. *Water* **2020**, *12*, 3399. <https://doi.org/10.3390/w12123399>.
59. Yan, J.; Liu, J.; Yu, Y.; Xu, H. Water Quality Prediction in the Luan River Based on 1-DRCNN and BiGRU Hybrid Neural Network Model. *Water* **2021**, *13*, 1273. <https://doi.org/10.3390/w13091273>.
60. Hien Than, N.; Dinh Ly, C.; Van Tat, P. The performance of classification and forecasting Dong Nai River water quality for sustainable water resources management using neural network techniques. *J. Hydrol.* **2021**, *596*, 126099. <https://doi.org/10.1016/j.jhydrol.2021.126099>.
67. Aghel, B.; Rezaei, A.; Mohadesi, M. Modeling and prediction of water quality parameters using a hybrid particle swarm optimization–neural fuzzy approach. *Int. J. Environ. Sci. Technol.* **2018**, *16*, 4823–4832. <https://doi.org/10.1007/s13762-018-1896-3>.
68. Azad, A.; Karami, H.; Farzin, S.; Mousavi, S.-F.; Kisi, O. Modeling river water quality parameters using modified adaptive neuro fuzzy inference system. *Water Sci. Eng.* **2019**, *12*, 45–54. <https://doi.org/10.1016/j.wse.2018.11.001>.
69. Shah, M.I.; Javed, M.F.; Alqahtani, A.; Aldrees, A. Environmental assessment based surface water quality prediction using hyper-parameter optimized machine learning models based on consistent big data. *Process Saf. Environ. Prot.* **2021**, *151*, 324–340. <https://doi.org/10.1016/j.psep.2021.05.026>.
73. Azad, A.; Karami, H.; Farzin, S.; Saeedian, A.; Kashi, H.; Sayyahi, F. Prediction of Water Quality Parameters Using ANFIS Optimized by Intelligence Algorithms (Case Study: Gorganrood River). *KSCE J. Civ. Eng.* **2017**, *22*, 2206–2213. <https://doi.org/10.1007/s12205-017-1703-6>.
74. Stajkowski, S.; Kumar, D.; Samui, P.; Bonakdari, H.; Gharabaghi, B. Genetic-Algorithm-Optimized Sequential Model for Water Temperature Prediction. *Sustainability* **2020**, *12*, 5374. <https://doi.org/10.3390/su12135374>.
75. Jin, T.; Cai, S.; Jiang, D.; Liu, J. A data-driven model for real-time water quality prediction and early warning by an integration method. *Environ. Sci. Pollut. Res. Int.* **2019**, *26*, 30374–30385. <https://doi.org/10.1007/s11356-019-06049-2>.
78. Raheli, B.; Aalami, M.T.; El-Shafie, A.; Ghorbani, M.A.; Deo, R.C. Uncertainty assessment of the multilayer perceptron (MLP) neural network model with implementation of the novel hybrid MLP-FFA method for prediction of biochemical oxygen demand and dissolved oxygen: A case study of Langat River. *Environ. Earth Sci.* **2017**, *76*, 503. <https://doi.org/10.1007/s12665-017-6842-z>.
80. Chatterjee, S.; Sarkar, S.; Dey, N.; Ashour, A.S.; Sen, S.; Hassanien, A.E. Application of cuckoo search in water quality prediction using artificial neural network. *Int. J. Comput. Intell. Stud.* **2017**, *6*, 229–244. [doi:doi.org/10.1504/IJCISTUDIES.2017.089054](https://doi.org/10.1504/IJCISTUDIES.2017.089054).

81. Li, Z.; Peng, F.; Niu, B.; Li, G.; Wu, J.; Miao, Z. Water Quality Prediction Model Combining Sparse Auto-encoder and LSTM Network. *IFAC PapersOnLine* **2018**, *51*–17, 831–836. <https://doi.org/10.1016/j.ifacol.2018.08.09>.
83. Chen, S.; Fang, G.; Huang, X.; Zhang, Y. Water Quality Prediction Model of a Water Diversion Project Based on the Improved Artificial Bee Colony–Backpropagation Neural Network. *Water* **2018**, *10*, 806. <https://doi.org/10.3390/w10060806>.
85. Zhou, J.; Wang, Y.; Xiao, F.; Wang, Y.; Sun, L. Water Quality Prediction Method Based on IGRA and LSTM. *Water* **2018**, *10*, 1148. <https://doi.org/10.3390/w10091148>.
86. Kadkhodazadeh, M.; Farzin, S. A Novel LSSVM Model Integrated with GBO Algorithm to Assessment of Water Quality Parameters. *Water Resour. Manag.* **2021**, *35*, 3939–3968. <https://doi.org/10.1007/s11269-021-02913-4>.
87. Dehghani, R.; Torabi Poudeh, H.; Izadi, Z. Dissolved oxygen concentration predictions for running waters with using hybrid machine learning techniques. *Modeling Earth Syst. Environ.* **2021**, *8*, 2599–2613. <https://doi.org/10.1007/s40808-021-01253-x>.
89. Solgi, A.; Pourhaghi, A.; Bahmani, R.; Zarei, H. Improving SVR and ANFIS performance using wavelet transform and PCA algorithm for modeling and predicting biochemical oxygen demand (BOD). *Ecohydrol. Hydrobiol.* **2017**, *17*, 164–175. <https://doi.org/10.1016/j.ecohyd.2017.02.002>.
90. Al-Sulttani, A.O.; Al-Mukhtar, M.; Roomi, A.B.; Farooque, A.A.; Khedher, K.M.; Yaseen, Z.M. Proposition of New Ensemble Data-Intelligence Models for Surface Water Quality Prediction. *IEEE Access* **2021**, *9*, 108527–108541. <https://doi.org/10.1109/access.2021.3100490>.
91. Bi, J.; Lin, Y.; Dong, Q.; Yuan, H.; Zhou, M. Large-scale water quality prediction with integrated deep neural network. *Inf. Sci.* **2021**, *571*, 191–205. <https://doi.org/10.1016/j.ins.2021.04.057>.
92. Ahmed, A.A.M.; Chowdhury, M.A.I.; Ahmed, O.; Sutradhar, A. Development of Dissolved Oxygen Forecast Model Using Hybrid Machine Learning Algorithm with Hydro-Meteorological Variables. 2021. <https://doi.org/10.21203/rs.3.rs-1100147/v1>.
93. Ahmadianfar, I.; Jamei, M.; Chu, X. A novel Hybrid Wavelet-Locally Weighted Linear Regression (W-LWLR) Model for Electrical Conductivity (EC) Prediction in Surface Water. *J. Contam. Hydrol.* **2020**, *232*, 103641. <https://doi.org/10.1016/j.jconhyd.2020.103641>.
94. Eze, E.; Halse, S.; Ajmal, T. Developing a Novel Water Quality Prediction Model for a South African Aquaculture Farm. *Water* **2021**, *13*, 1782. <https://doi.org/10.3390/w13131782>.
95. Yan, J.; Gao, Y.; Yu, Y.; Xu, H.; Xu, Z. A Prediction Model Based on Deep Belief Network and Least Squares SVR Applied to Cross-Section Water Quality. *Water* **2020**, *12*, 1929. <https://doi.org/10.3390/w12071929>.
96. Wang, Y.; Yuan, Y.; Pan, Y.; Fan, Z. Modeling Daily and Monthly Water Quality Indicators in a Canal Using a Hybrid Wavelet-Based Support Vector Regression Structure. *Water* **2020**, *12*, 1476. <https://doi.org/10.3390/w12051476>.
97. Song, C.; Yao, L.; Hua, C.; Ni, Q. A novel hybrid model for water quality prediction based on synchrosqueezed wavelet transform technique and improved long short-term memory. *J. Hydrol.* **2021**, *603*, 126879. <https://doi.org/10.1016/j.jhydrol.2021.126879>.
98. Jamei, M.; Ahmadianfar, I.; Karbasi, M.; Jawad, A.H.; Farooque, A.A.; Yaseen, Z.M. The assessment of emerging data-intelligence technologies for modeling Mg(+2) and SO<sub>4</sub>(-2) surface water quality. *J. Environ. Manag.* **2021**, *300*, 113774. <https://doi.org/10.1016/j.jenvman.2021.113774>.
99. Sha, J.; Li, X.; Zhang, M.; Wang, Z.-L. Comparison of Forecasting Models for Real-Time Monitoring of Water Quality Parameters Based on Hybrid Deep Learning Neural Networks. *Water* **2021**, *13*, 1547. <https://doi.org/10.3390/w13111547>.
100. Yan, J.; Xu, Z.; Yu, Y.; Xu, H.; Gao, K. Application of a Hybrid Optimized BP Network Model to Estimate Water Quality Parameters of Beihai Lake in Beijing. *Appl. Sci.* **2019**, *9*, 1863. <https://doi.org/10.3390/app9091863>.
101. Abba, S.I.; Linh, N.T.T.; Abdullahi, J.; Ali, S.I.A.; Pham, Q.B.; Abdulkadir, R.A.; Costache, R.; Nam, V.T.; Anh, D.T. Hybrid Machine Learning Ensemble Techniques for Modeling Dissolved Oxygen Concentration. *IEEE Access* **2020**, *8*, 157218–157237. <https://doi.org/10.1109/access.2020.3017743>.
102. Song, C.; Yao, L.; Hua, C.; Ni, Q. A water quality prediction model based on variational mode decomposition and the least squares support vector machine optimized by the sparrow search algorithm (VMD-SSA-LSSVM) of the Yangtze River, China. *Environ. Monit. Assess* **2021**, *193*, 363. <https://doi.org/10.1007/s10661-021-09127-6>.
103. Deng, T.; Chau, K.W.; Duan, H.F. Machine learning based marine water quality prediction for coastal hydro-environment management. *J. Environ. Manag.* **2021**, *284*, 112051. <https://doi.org/10.1016/j.jenvman.2021.112051>.
104. Huang, J.; Liu, S.; Hassan, S.G.; Xu, L.; Huang, C. A hybrid model for short-term dissolved oxygen content prediction. *Comput. Electron. Agric.* **2021**, *186*, 106216. <https://doi.org/10.1016/j.compag.2021.106216>.
105. Jiang, J.; Tang, S.; Liu, R.; Sivakumar, B.; Wu, X.; Pang, T. A hybrid wavelet-Lyapunov exponent model for river water quality forecast. *J. Hydroinformatics* **2021**, *23*, 864–878. <https://doi.org/10.2166/hydro.2021.023>.

106. Maroufpoor, S.; Jalali, M.; Nikmehr, S.; Shiri, N.; Shiri, J.; Maroufpoor, E. Modeling groundwater quality by using hybrid intelligent and geostatistical methods. *Environ. Sci. Pollut. Res. Int.* **2020**, *27*, 28183–28197. <https://doi.org/10.1007/s11356-020-09188-z>.
107. Jafari, H.; Rajaei, T.; Kisi, O. Improved Water Quality Prediction with Hybrid Wavelet-Genetic Programming Model and Shannon Entropy. *Nat. Resour. Res.* **2020**, *29*, 3819–3840. <https://doi.org/10.1007/s11053-020-09702-7>.
108. Ye, Q.; Yang, X.; Chen, C.; Wang, J. River Water Quality Parameters Prediction Method Based on LSTM-RNN Model. In Proceedings of the 31th Chinese Control and Decision Conference (2019 CCDC), Nanchang, China, 3–5 June 2019. . <https://doi.org/10.1109/CCDC.2019.8832885>.
109. Li, L.; Jiang, P.; Xu, H.; Lin, G.; Guo, D.; Wu, H. Water quality prediction based on recurrent neural network and improved evidence theory: A case study of Qiantang River, China. *Environ. Sci. Pollut. Res. Int.* **2019**, *26*, 19879–19896. <https://doi.org/10.1007/s11356-019-05116-y>.
110. Parmar, K.S.; Makkhan, S.J.S.; Kaushal, S. Neuro-fuzzy-wavelet hybrid approach to estimate the future trends of river water quality. *Neural Comput. Appl.* **2019**, *31*, 8463–8473. <https://doi.org/10.1007/s00521-019-04560-8>.
111. Kisi, O.; Azad, A.; Kashi, H.; Saeedian, A.; Hashemi, S.A.A.; Ghorbani, S. Modeling Groundwater Quality Parameters Using Hybrid Neuro-Fuzzy Methods. *Water Resour. Manag.* **2018**, *33*, 847–861. <https://doi.org/10.1007/s11269-018-2147-6>.
112. Fijani, E.; Barzegar, R.; Deo, R.; Tziritis, E.; Skordas, K. Design and implementation of a hybrid model based on two-layer decomposition method coupled with extreme learning machines to support real-time environmental monitoring of water quality parameters. *Sci. Total Environ.* **2019**, *648*, 839–853. <https://doi.org/10.1016/j.scitotenv.2018.08.221>.
113. Shao, D.; Nong, X.; Tan, X.; Chen, S.; Xu, B.; Hu, N. Daily Water Quality Forecast of the South-To-North Water Diversion Project of China Based on the Cuckoo Search-Back Propagation Neural Network. *Water* **2018**, *10*, 1471. <https://doi.org/10.3390/w10101471>.
114. Montaseri, M.; Zaman Zad Ghavidel, S.; Sanikhani, H. Water quality variations in different climates of Iran: Toward modeling total dissolved solid using soft computing techniques. *Stoch. Environ. Res. Risk Assess.* **2018**, *32*, 2253–2273. <https://doi.org/10.1007/s00477-018-1554-9>.
115. Huang, M.; Tian, D.; Liu, H.; Zhang, C.; Yi, X.; Cai, J.; Ruan, J.; Zhang, T.; Kong, S.; Ying, G. A Hybrid Fuzzy Wavelet Neural Network Model with Self-Adapted Fuzzy c-Means Clustering and Genetic Algorithm for Water Quality Prediction in Rivers. *Complexity* **2018**, *2018*, 8241342. <https://doi.org/10.1155/2018/8241342>.
116. Barzegar, R.; Asghari Moghaddam, A.; Adamowski, J.; Ozga-Zielinski, B. Multi-step water quality forecasting using a boosting ensemble multi-wavelet extreme learning machine model. *Stoch. Environ. Res. Risk Assess.* **2017**, *32*, 799–813. <https://doi.org/10.1007/s00477-017-1394-z>.
